# Supplementary material for: Hydride transfer reactivity of tetrakis(trimethylphosphine)(hydrido)(nitrosyl)molybdenum(0)
Source: Royal Society of Chemistry journal article supplement (doi:10.1039/b511797f), 2005-11-23
Supplement: b511797f.pdf [file b511797f.pdf]

## Supplementary Material

# Hydride Transfer Reactivity of *Tetrakis*(trimethylphosphine) (hydrido) (nitrosyl) molybdenum(0)

*Yin Zhao, Helmut W. Schmalle, Thomas Fox, Olivier Blacque and Heinz Berke\**

Department of Inorganic Chemistry, University of Zürich, Winterthurerstrasse 190,  
8057 Zürich, Switzerland.

Yin Zhao: [yzhao@aci.unizh.ch](mailto:yzhao@aci.unizh.ch)

Helmut W. Schmalle: [schmalle@aci.unizh.ch](mailto:schmalle@aci.unizh.ch)

Thomas Fox: [fox@aci.unizh.ch](mailto:fox@aci.unizh.ch);

Olivier Blacque: [oblacque@aci.unizh.ch](mailto:oblacque@aci.unizh.ch)

Heinz Berke: [hberke@aci.unizh.ch](mailto:hberke@aci.unizh.ch)

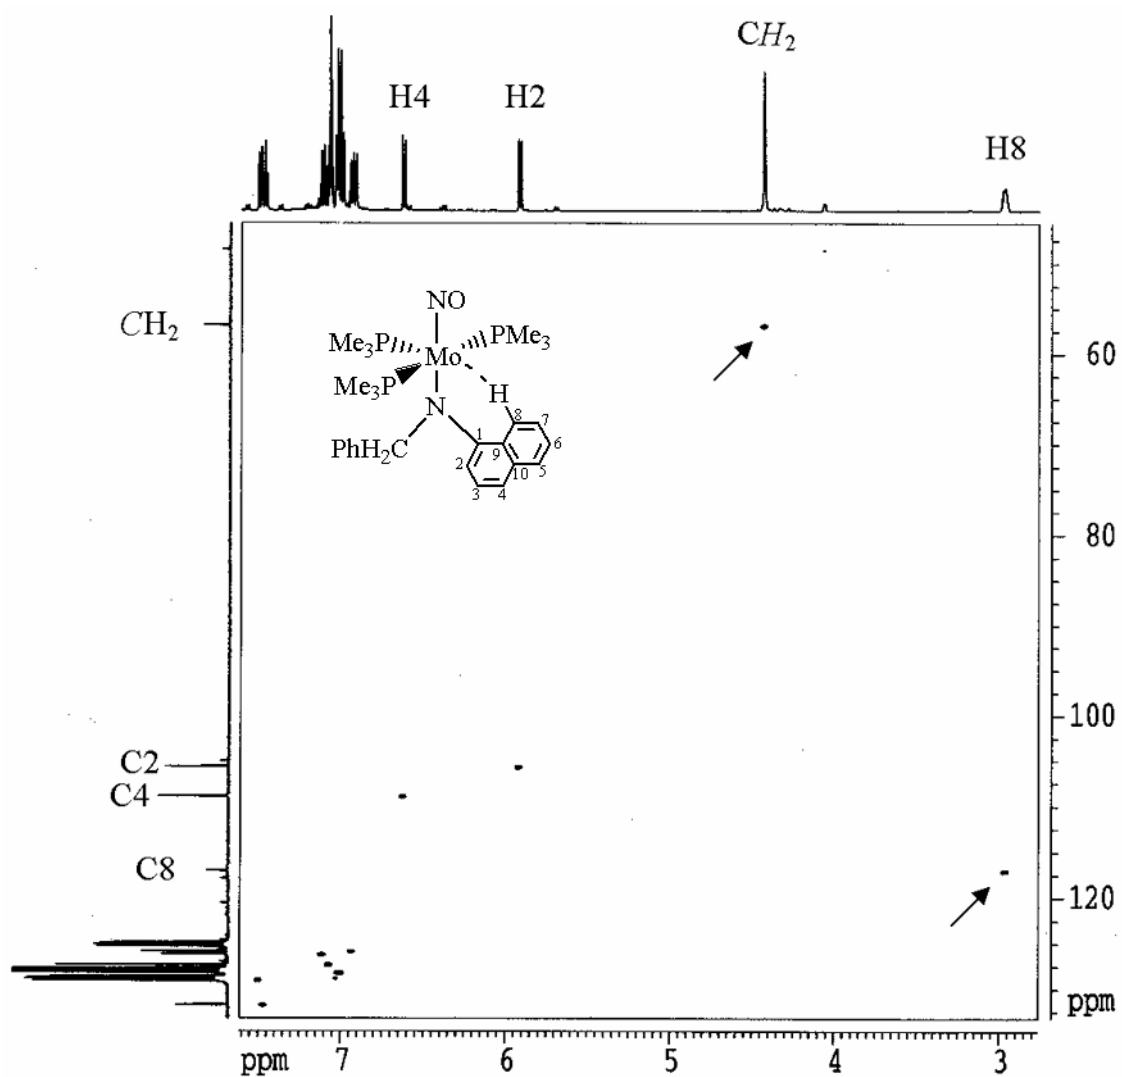

**Figure S1.**  $^{13}\text{C}$ - $^1\text{H}$  correlation NMR spectrum of **10** at room temperature in toluene- $d_8$ . Discussion of the signals indicated by arrows see text.

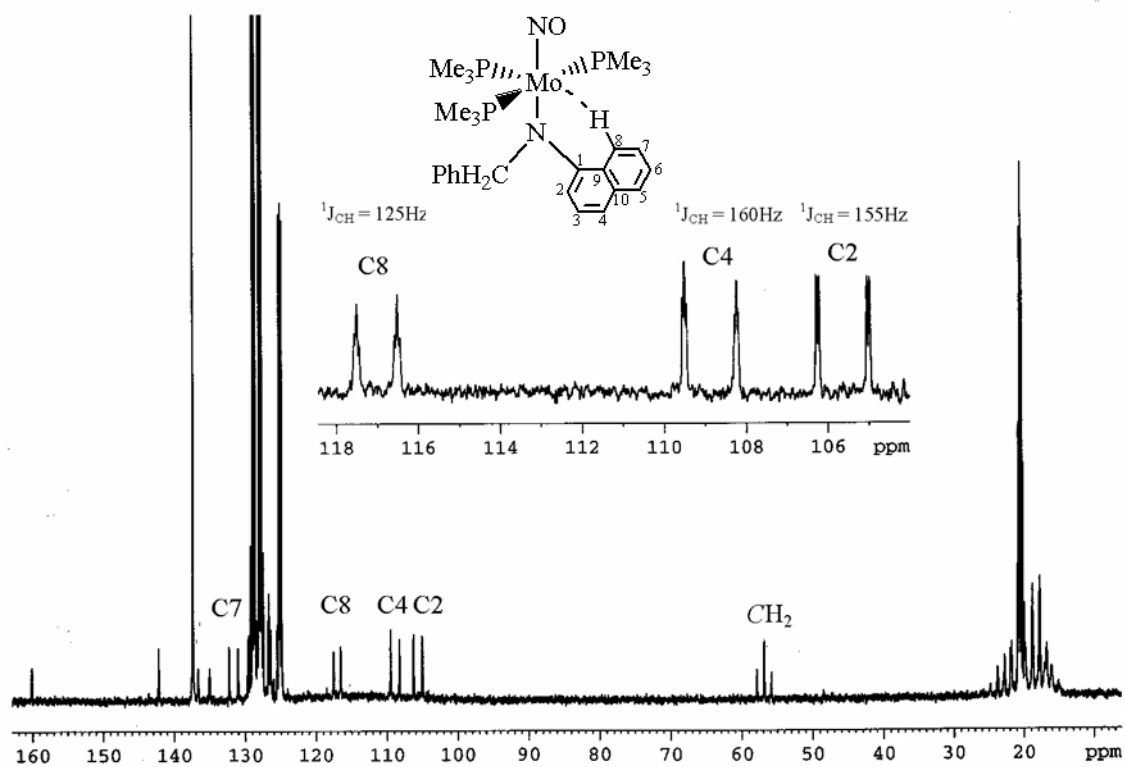

**Figure S2.** Gated  $^{13}\text{C}$  NMR spectrum of **10** at room temperature in  $\text{C}_6\text{D}_6$ , no proton decoupling during acquisition time.

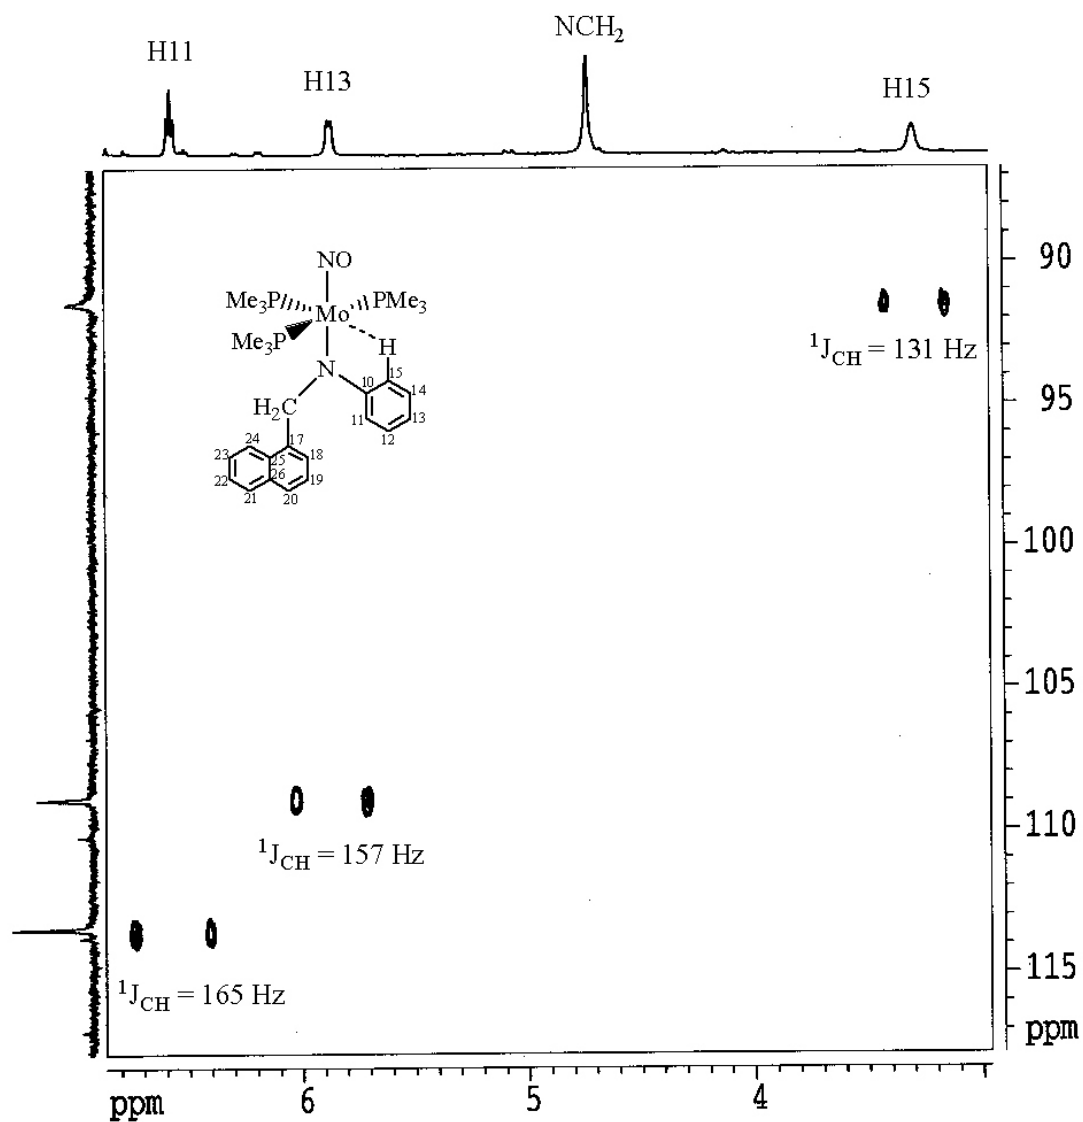

**Figure S3.**  $^{13}\text{C}$ - $^1\text{H}$  correlation NMR of **12** at  $-60\text{ }^\circ\text{C}$  in toluene- $d_8$ . No  $^{13}\text{C}$  decoupling during the acquisition time.
